# Supplementary material for: Facile conversion of RAFT polymers into hydroxyl functional polymers: a detailed investigation of variable monomer and RAFT agent combinations
Source: Royal Society of Chemistry journal article supplement (doi:10.1039/b9py00273a), 2010-01-01
Supplement: b9py00273a.pdf [file b9py00273a.pdf]

## Supporting Information

# Facile Conversion of RAFT Polymers into Hydroxyl Functional Polymers: A Detailed Investigation of Variable Monomer and RAFT Agent Combinations

*Mathias Dietrich,<sup>1,3</sup> Mathias Glassner,<sup>1</sup> Till Gruending,<sup>1,2</sup> Christina Schmid,<sup>1</sup> Jana Falkenhagen,<sup>4</sup> and Christopher Barner-Kowollik<sup>1\*</sup>*

<sup>1</sup> Preparative Macromolecular Chemistry, Institut für Technische und Polymerchemie, Universität Karlsruhe (TH)/Karlsruhe Institute of Technology (KIT), Engesserstr. 18, 76128 Karlsruhe, Germany.\*Corresponding author, Tel.: +49 721 608 5641, Fax: +49 721 608 5740  
e-mail: [christopher.barner-kowollik@polymer.uni-karlsruhe.de](mailto:christopher.barner-kowollik@polymer.uni-karlsruhe.de)

<sup>2</sup> Bioanalytical Mass Spectrometry Facility, UNSW Analytical Centre, The University of New South Wales, Sydney, New South Wales 2052, Australia.

<sup>3</sup> Environmental Engineering Group, Fraunhofer Institute of Chemical Technology, Joseph-von-Fraunhofer-Str. 7, 76327 Pfinztal, Germany.

<sup>4</sup> Federal Institute for Materials Research and Testing (BAM), Department I, Richard-Willstaetter-Strasse 11, D-12489 Berlin, Germany.

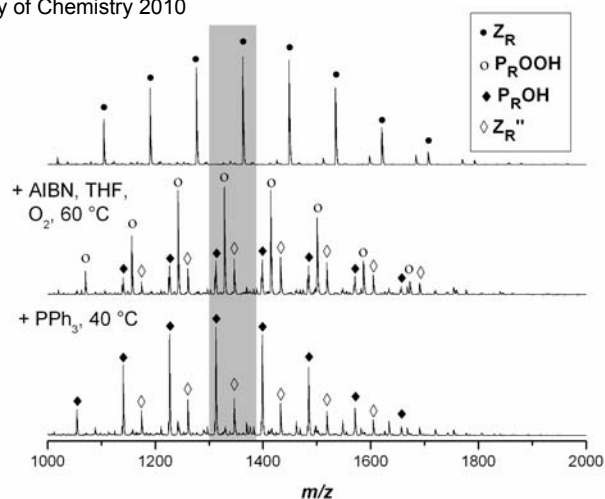

**Figure S1** - Electrospray ionization mass spectra of the end-group transformation of poly(methyl acrylate) carrying a dithiobenzoate end-group into hydroxyl functional pMA in the charge state  $z = 1$ . The range highlighted in grey is shown in Figure 1.

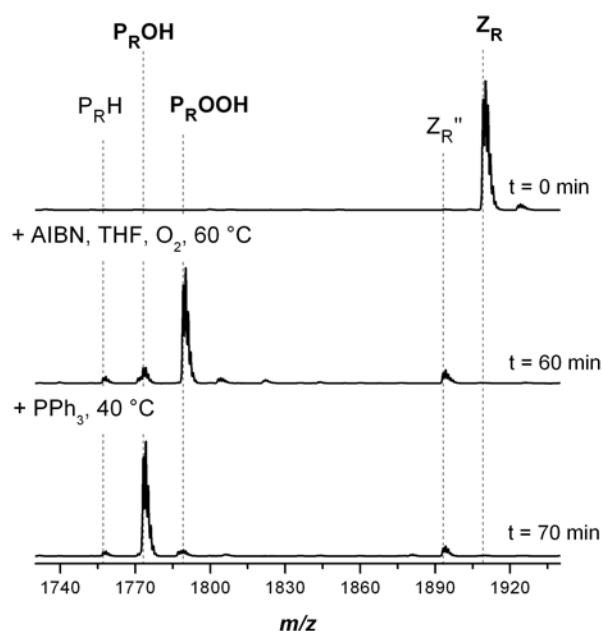

**Figure S2** - Electrospray ionization mass spectra of the end-group transformation of poly(*isobornyl* acrylate) carrying a dithiobenzoate end-group into hydroxyl functional *pi*BoA in the charge state  $z = 1$ . The reagents AIBN/THF and  $PPh_3$  were added sequentially at  $t = 0$  and 60 min. Full conversion was reached after 70 min.

**Table T1** - Theoretical and measured  $m/z$  ratios of the main species involved in the end-group conversion of *p*iBoA carrying a dithiobenzoate end-group into hydroxyl functional *p*iBoA.

| Struktur        | $[M + Na]^+$        |                    |              |
|-----------------|---------------------|--------------------|--------------|
|                 | $m/z^{\text{theo}}$ | $m/z^{\text{exp}}$ | $\Delta m/z$ |
| $Z_R$           | 1909.19             | 1909.17            | 0.02         |
| $Z_R''$         | 1893.22             | 1893.17            | 0.05         |
| $P_R\text{OOH}$ | 1789.21             | 1789.17            | 0.04         |
| $P_R\text{OH}$  | 1773.21             | 1773.25            | 0.04         |
| $P_R\text{H}$   | 1757.22             | 1757.25            | 0.03         |

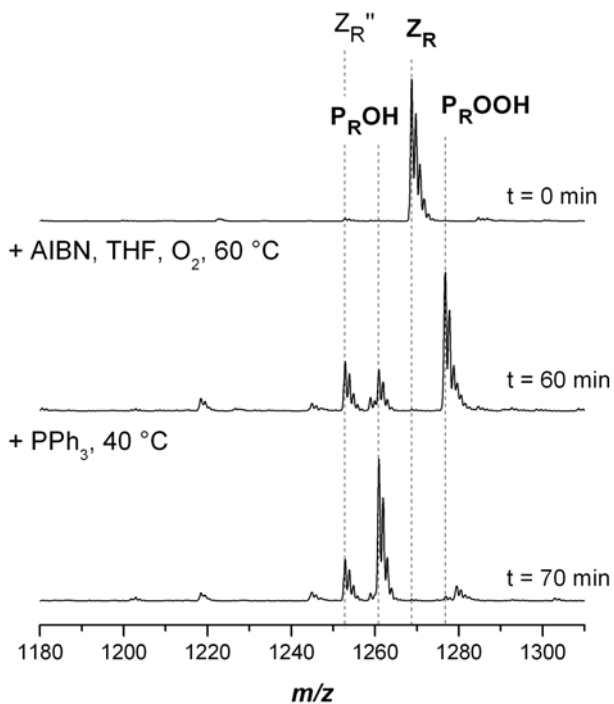

**Figure S3-** Electrospray ionization mass spectra of the end-group transformation of poly(butyl acrylate) carrying a dithiobenzoate end-group into hydroxyl functional pBA in the charge state  $z = 1$ . The reagents AIBN/THF and PPh<sub>3</sub> were added sequentially at  $t = 0$  and 60 min. Full conversion was reached after 70 min.

**Table T2** - Theoretical and measured  $m/z$  ratios of the main species involved in the end-group conversion of pBA carrying a dithiobenzoate end-group into hydroxyl functional pBA.

| Struktur        | $[M + Na]^+$        |                    |              |
|-----------------|---------------------|--------------------|--------------|
|                 | $m/z^{\text{theo}}$ | $m/z^{\text{exp}}$ | $\Delta m/z$ |
| $Z_R$           | 1268.69             | 1268.75            | 0.06         |
| $Z_R''$         | 1252.72             | 1252.83            | 0.11         |
| $P_R\text{OOH}$ | 1276.79             | 1276.75            | 0.04         |
| $P_R\text{OH}$  | 1260.80             | 1260.92            | 0.12         |

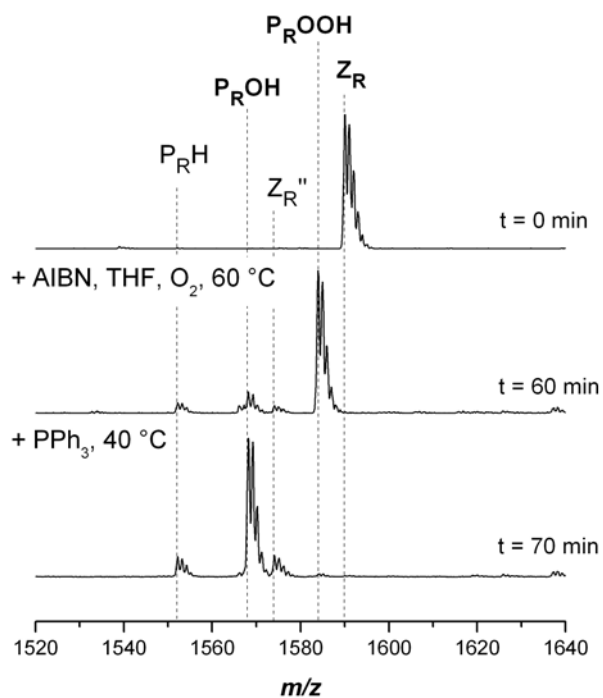

**Figure S4** - Electrospray ionization mass spectra of the end-group transformation of poly(butyl acrylate) carrying a phenyldithioacetate end-group into hydroxyl functional pBA in the charge state  $z = 1$ . The reagents AIBN/THF and  $\text{PPh}_3$  were added sequentially at  $t = 0$  and 60 min. Full conversion was reached after 70 min.

**Table T3** - Theoretical and measured  $m/z$  ratios of the main species involved in the end-group conversion of pBA carrying a phenyldithioacetate end-group into hydroxyl functional pBA.

| Struktur                | $[\text{M} + \text{Na}]^+$ |                    |              |
|-------------------------|----------------------------|--------------------|--------------|
|                         | $m/z^{\text{theo}}$        | $m/z^{\text{exp}}$ | $\Delta m/z$ |
| <b>Z<sub>R</sub></b>    | 1589.91                    | 1590.08            | 0.17         |
| <b>P<sub>R</sub>OOH</b> | 1584.00                    | 1584.00            | 0.00         |
| <b>Z<sub>R</sub>''</b>  | 1573.94                    | 1574.00            | 0.06         |
| <b>P<sub>R</sub>OH</b>  | 1568.00                    | 1568.17            | 0.17         |
| <b>P<sub>R</sub>H</b>   | 1552.00                    | 1552.17            | 0.17         |
